# Supplementary material for: Composition and oxidation state of sulfur in atmospheric particulate matter
Source: Copernicus journal article supplement (doi:10.5194/acp-16-13389-2016), 2016-10-31
Supplement: Supplementary file 1 [file acp-16-13389-2016-supplement.zip]

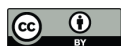

*Supplement of*

## **Composition and oxidation state of sulfur in atmospheric particulate matter**

**Amelia F. Longo et al.**

*Correspondence to:* Ellery D. Ingall ([ingall@eas.gatech.edu](mailto:ingall@eas.gatech.edu))

- [acp-16-13389-2016-supplement-title-page.pdf](#)
- [Supplement\\_ACP](#)
  - [Sulfate Standard Database.xlsx](#)
  - [Supplementary Information.docx](#)

The copyright of individual parts of the supplement might differ from the CC-BY 3.0 licence.
