# Supplementary material for: Composition and oxidation state of sulfur in atmospheric particulate matter
Source: Copernicus journal article supplement (doi:10.5194/acp-16-13389-2016), 2016-10-31
Supplement: Supplementary file 1 [file Sulfate Standard Database.xlsx]

## Sheet: Sulfate Standards
Energy (eV)	Ammonium Sulfate	Barite	Copper(II) Sulfate	Gypsum	Iron Ammonium Sulfate	Iron(III) Sulfate	Jarosite	Magnesium Sulfate	Potassium Sulfate	Sodium Sulfate
2462.95	0.0076035	0.00128732	0.0469857	0.00690746	-0.00437003	0.017578	0.0126129	0.0377139	0.0264947	0.0394045
2463.28	0.00454422	0.00118474	0.044105	0.0061986	-0.00569024	0.016289	0.0125972	0.0357765	0.0248953	0.0378887
2463.62	0.00345385	0.00108213	0.0412235	0.00548952	-0.00701084	0.0149995	0.0125815	0.0338385	0.0232955	0.0363725
2463.95	0.00372261	0.000979557	0.0383428	0.00478066	-0.00833105	0.0137105	0.0125657	0.0319012	0.0216962	0.0348568
2464.28	0.00416109	0.00087698	0.0354622	0.00407179	-0.00965126	0.0124214	0.01255	0.0299638	0.0200969	0.033341
2464.62	0.00374278	0.000774373	0.0325807	0.00336272	-0.0109719	0.0111319	0.0125343	0.0280259	0.018497	0.0318248
2464.95	0.00195385	0.000671797	0.0297	0.00297603	-0.0122921	0.0101673	0.0125186	0.0260885	0.0168977	0.0303091
2465.28	-0.000697263	0.000647744	0.0268194	0.00279217	-0.0136123	0.00998907	0.0125029	0.0241511	0.0152984	0.0287933
2465.62	-0.00284486	0.0010991	0.0239379	0.00253573	-0.0149329	0.0100295	0.0124871	0.0222132	0.0136985	0.0272771
2465.95	-0.00377935	0.00165909	0.0210572	0.00183395	-0.0162531	0.00951776	0.0124714	0.0202758	0.0120992	0.0257614
2466.28	-0.0040371	0.00173105	0.0181766	0.000647331	-0.0175733	0.00837216	0.0124557	0.0183385	0.0104999	0.0242456
2466.62	-0.00420335	0.00101344	0.015295	-0.000336666	-0.0188939	0.00746231	0.01244	0.0164005	0.00932642	0.0227294
2466.95	-0.00429388	2.66246e-05	0.0124144	-0.000459892	-0.0202141	0.00701942	0.0126642	0.0147293	0.00870491	0.0210671
2467.28	-0.00425483	-0.000618465	0.00948396	-0.000182498	-0.0215343	0.0058923	0.0122419	0.013066	0.00798005	0.0188242
2467.62	-0.00387647	-0.000823613	0.00637632	-0.000541658	-0.0228549	0.00379986	0.0106014	0.0110965	0.00661121	0.0160422
2467.95	-0.00313723	-0.000603219	0.004003	-0.00160573	-0.0225396	0.00217662	0.00833054	0.00909377	0.0048445	0.01343
2468.28	-0.00320469	-0.000254527	0.00245765	-0.00242548	-0.020293	0.00160494	0.00618024	0.00752619	0.00329709	0.0109964
2468.62	-0.00483425	-0.000429262	0.00131871	-0.00255558	-0.016861	0.00095134	0.00437125	0.00636585	0.00218302	0.00861251
2468.95	-0.00651207	-0.00114266	0.000305502	-0.00248297	-0.0128714	-0.000545084	0.0027666	0.00515783	0.00129018	0.00662058
2469.28	-0.00646511	-0.00175447	-0.000432457	-0.00245422	-0.0091189	-0.00227676	0.00122399	0.00367887	0.000398315	0.00533633
2469.62	-0.00461968	-0.00201801	-0.000824503	-0.00225165	-0.00599283	-0.00331238	-0.00019192	0.00206844	-0.000550628	0.00448467
2469.95	-0.00193717	-0.00204677	-0.00125203	-0.00201472	-0.00299688	-0.00356989	-0.000962012	0.000460769	-0.00152737	0.00341694
2470.28	0.000258543	-0.0017735	-0.00190643	-0.00204589	0.000312567	-0.0040668	-0.000651333	-0.0011518	-0.00237575	0.00175712
2470.62	0.000986724	-0.00120334	-0.00240833	-0.00212469	0.00362693	-0.00575035	4.10777e-05	-0.00271593	-0.00291142	-0.000359961
2470.95	0.000807025	-0.000492466	-0.00240739	-0.00162482	0.00661558	-0.00780092	-0.000255795	-0.00399189	-0.00323146	-0.00242769
2471.28	0.00162968	0.000378318	-0.00199579	-0.000107593	0.00954729	-0.00839706	-0.00187674	-0.00483926	-0.00364119	-0.0038881
2471.62	0.00472812	0.00121649	-0.00153168	0.00208662	0.0127808	-0.0075944	-0.00373408	-0.00546088	-0.00428004	-0.00462992
2471.95	0.0090573	0.00140445	-0.00117828	0.00373351	0.0158995	-0.00730354	-0.00477246	-0.00611041	-0.00499863	-0.00507475
2472.28	0.012048	0.000917364	-0.000762106	0.00373885	0.0175931	-0.00815635	-0.00503316	-0.00681439	-0.0056141	-0.00560337
2472.62	0.0126532	0.000510217	-0.000277039	0.00240361	0.0169503	-0.00875814	-0.00501399	-0.00742385	-0.00611577	-0.00604293
2472.95	0.0131977	0.000431893	6.71141e-05	0.000969715	0.0149231	-0.00804625	-0.00496548	-0.00769686	-0.00643281	-0.00600825
2473.28	0.0167157	0.000417161	0.000230191	0.000109663	0.0134441	-0.0067165	-0.00507998	-0.00755721	-0.00640062	-0.00576216
2473.62	0.0228214	0.000642703	0.000262168	2.3531e-05	0.0128397	-0.00606299	-0.00540667	-0.00729334	-0.00624926	-0.00603877
2473.95	0.0287458	0.00123263	0.000320518	0.00104508	0.0113953	-0.00625863	-0.00568469	-0.00726839	-0.00648377	-0.00697302
2474.28	0.033787	0.00174343	0.000661425	0.0030232	0.00809229	-0.0063445	-0.00578157	-0.00754325	-0.00702634	-0.00819638
2474.62	0.0394307	0.00202933	0.00122001	0.0052772	0.0043052	-0.00541563	-0.00557222	-0.0078318	-0.00713256	-0.00979253
2474.95	0.0459534	0.00254062	0.0017284	0.00733361	0.00190381	-0.0034719	-0.00466825	-0.00784969	-0.00630188	-0.0119001
2475.28	0.0520485	0.00352506	0.00214785	0.00911987	0.00102208	-0.00139084	-0.00326851	-0.00767456	-0.00482139	-0.0136539
2475.62	0.0575465	0.00478723	0.00272903	0.0110399	0.000350174	0.000178674	-0.00221717	-0.00741912	-0.00326802	-0.013919
2475.95	0.064344	0.00611776	0.00408574	0.0138256	-0.00137383	0.00184323	-0.00158886	-0.00678256	-0.00174987	-0.0127107
2476.28	0.0741011	0.00744346	0.00668789	0.0176836	-0.00424736	0.00501022	-0.000593868	-0.00536729	-6.58957e-05	-0.0106158
2476.62	0.0865473	0.00871917	0.00984896	0.0217597	-0.00713773	0.011131	0.00116721	-0.00300314	0.00176019	-0.00774845
2476.95	0.100349	0.010028	0.0122677	0.0251796	-0.00895134	0.0220704	0.00379333	0.00037681	0.00387891	-0.00427628
2477.28	0.114421	0.0118232	0.0139595	0.0285218	-0.00970312	0.0402744	0.00834702	0.00467686	0.00695825	-0.000573251
2477.62	0.129215	0.0148376	0.0166569	0.0330566	-0.0101257	0.0666998	0.0172968	0.0098642	0.0115126	0.00359027
2477.95	0.146901	0.0195313	0.0218416	0.0390242	-0.0109499	0.0983016	0.0340207	0.0166607	0.0175695	0.00913275
2478.28	0.168927	0.0253969	0.0292535	0.0460274	-0.0121761	0.130136	0.0616488	0.026197	0.0253097	0.0174662
2478.62	0.195396	0.0312863	0.038066	0.054427	-0.0125017	0.160674	0.101101	0.0389829	0.0356126	0.0300981
2478.95	0.227764	0.037132	0.0487869	0.0653418	-0.0102492	0.192555	0.150483	0.0554206	0.0496807	0.0477924
2479.28	0.268706	0.0440884	0.0635215	0.0793509	-0.00473879	0.227491	0.206258	0.0770487	0.0682024	0.071567
2479.62	0.319468	0.0528747	0.0854703	0.0962435	0.00432266	0.262478	0.262756	0.106071	0.0916131	0.10423
2479.95	0.380784	0.064629	0.119238	0.117666	0.0189383	0.293795	0.313968	0.144951	0.121667	0.149971
2480.28	0.457711	0.0827918	0.172623	0.149515	0.0443113	0.32853	0.362826	0.198645	0.162467	0.216403
2480.62	0.565998	0.112468	0.258615	0.201994	0.0903568	0.393205	0.429015	0.277037	0.221111	0.318549
2480.95	0.735624	0.162048	0.392761	0.292196	0.175385	0.527862	0.544107	0.394041	0.308969	0.475067
2481.28	1.00246	0.249194	0.586207	0.447855	0.327404	0.769685	0.734536	0.561019	0.44014	0.696343
2481.62	1.38538	0.400362	0.840023	0.698607	0.572671	1.13565	1.00424	0.7759	0.623852	0.9749
2481.95	1.86149	0.633805	1.13811	1.04832	0.909205	1.60133	1.33005	1.01806	0.85365	1.28629
2482.28	2.36068	0.931572	1.44042	1.44924	1.27948	2.08673	1.66796	1.25456	1.10078	1.59684
2482.62	2.77185	1.22529	1.69101	1.80434	1.57368	2.47252	1.95583	1.45078	1.31947	1.86488
2482.95	2.99535	1.41955	1.83835	2.02223	1.67654	2.6487	2.1203	1.57895	1.47008	2.03588
2483.28	2.98623	1.44964	1.8525	2.04578	1.55669	2.56247	2.10134	1.62867	1.53007	2.06017
2483.62	2.76091	1.31924	1.72871	1.87021	1.29185	2.23572	1.88721	1.59657	1.48907	1.92999
2483.95	2.37612	1.10162	1.498	1.5539	1.00106	1.76658	1.53347	1.47911	1.35174	1.6754
2484.28	1.91883	0.897894	1.22081	1.20294	0.763803	1.29308	1.14135	1.28332	1.14751	1.36108
2484.62	1.49723	0.7702	0.958717	0.918587	0.600573	0.918714	0.805412	1.04039	0.93135	1.05849
2484.95	1.19042	0.711171	0.74957	0.747043	0.499332	0.672234	0.571612	0.802372	0.762995	0.81588
2485.28	1.00432	0.677715	0.604997	0.674913	0.440976	0.530447	0.434612	0.618063	0.675664	0.647105
2485.62	0.898242	0.637156	0.519747	0.663105	0.410122	0.457762	0.365838	0.509014	0.661819	0.544486
2485.95	0.835724	0.580261	0.478759	0.67567	0.39731	0.423537	0.339482	0.464473	0.686488	0.493208
2486.28	0.798005	0.512726	0.464077	0.68493	0.397263	0.406435	0.339709	0.4569	0.713793	0.475964
2486.62	0.771958	0.444849	0.462241	0.670309	0.404879	0.395544	0.355735	0.461108	0.725167	0.474542
2486.95	0.745842	0.385012	0.465788	0.626476	0.413992	0.388158	0.378292	0.462971	0.720749	0.474656
2487.28	0.714561	0.338845	0.470599	0.565903	0.421866	0.385614	0.39995	0.459099	0.710067	0.47178
2487.62	0.678906	0.309412	0.475085	0.507339	0.432553	0.389029	0.415858	0.452299	0.703079	0.46895
2487.95	0.641946	0.296214	0.479719	0.465016	0.45178	0.397743	0.425031	0.446606	0.70558	0.468202
2488.28	0.611071	0.296974	0.48481	0.445325	0.479613	0.411364	0.430042	0.443899	0.71697	0.468517
2488.62	0.596247	0.310163	0.490276	0.446823	0.512482	0.430445	0.433988	0.443409	0.729987	0.47114
2488.95	0.60073	0.334915	0.497246	0.462698	0.550135	0.453944	0.439903	0.444776	0.733397	0.480713
2489.28	0.618291	0.369908	0.506796	0.485309	0.594487	0.479985	0.45259	0.451204	0.717455	0.500387
2489.62	0.640424	0.411809	0.517653	0.509815	0.643899	0.509411	0.475801	0.46771	0.679714	0.529256
2489.95	0.660361	0.453572	0.527425	0.535781	0.694493	0.543946	0.506461	0.497125	0.626398	0.564783
2490.28	0.671326	0.485974	0.535775	0.565781	0.744004	0.581955	0.536183	0.53924	0.567751	0.604837
2490.62	0.668972	0.503178	0.544556	0.60277	0.790533	0.620301	0.559488	0.591334	0.513338	0.647014
2490.95	0.657284	0.506588	0.554397	0.648551	0.831492	0.657467	0.577684	0.647468	0.470447	0.689552
2491.28	0.646754	0.502171	0.563853	0.701515	0.865706	0.691222	0.595167	0.699156	0.443367	0.731102
2491.62	0.64333	0.496149	0.5729	0.754847	0.894244	0.718153	0.6151	0.738947	0.433971	0.764688
2491.95	0.642769	0.495353	0.58443	0.799429	0.91924	0.738456	0.63799	0.764822	0.444039	0.777539
2492.28	0.639615	0.507468	0.602016	0.829854	0.943046	0.755861	0.661326	0.78111	0.475932	0.763797
2492.62	0.636749	0.536901	0.627171	0.846363	0.967959	0.772937	0.681589	0.795174	0.529691	0.733347
2492.95	0.64177	0.580293	0.658523	0.851247	0.995498	0.791069	0.69865	0.814547	0.599377	0.704183
2493.28	0.659375	0.624515	0.69426	0.845761	1.0256	0.811743	0.716613	0.845767	0.673017	0.688311
2493.62	0.69058	0.652516	0.733787	0.830971	1.05615	0.834335	0.739281	0.891421	0.737952	0.686588
2493.95	0.734916	0.657541	0.775843	0.810091	1.0832	0.856503	0.766248	0.946662	0.788196	0.692378
2494.28	0.791085	0.648693	0.818224	0.789173	1.10336	0.878603	0.793895	1.00143	0.826643	0.697529
2494.62	0.855427	0.641625	0.859836	0.774768	1.11633	0.904662	0.819004	1.04645	0.860636	0.699134
2494.95	0.920042	0.648723	0.900035	0.771401	1.12375	0.938459	0.840819	1.07608	0.896384	0.702987
2495.28	0.977482	0.675245	0.936097	0.781645	1.12598	0.979269	0.86113	1.0876	0.936165	0.718638
2495.62	1.0279	0.719931	0.96398	0.805563	1.12251	1.02202	0.883515	1.08114	0.978573	0.752607
2495.95	1.07557	0.778528	0.982588	0.83939	1.11505	1.06308	0.912143	1.06125	1.02061	0.807427
2496.28	1.12041	0.844872	0.995715	0.878322	1.10683	1.10382	0.951013	1.03617	1.0597	0.883356
2496.62	1.15905	0.90891	1.00904	0.921093	1.09941	1.14691	1.00218	1.01378	1.09398	0.977066
2496.95	1.19089	0.958725	1.02679	0.970652	1.09344	1.19156	1.0629	0.998736	1.12158	1.07961
2497.28	1.2169	0.987469	1.04973	1.03007	1.09121	1.23322	1.12677	0.993677	1.14061	1.18061
2497.62	1.236	0.996219	1.07399	1.09805	1.09498	1.26772	1.18698	1.0002	1.15035	1.27407
2497.95	1.24858	0.990657	1.09502	1.16882	1.10307	1.29589	1.23669	1.01682	1.15303	1.35599
2498.28	1.25882	0.978803	1.11372	1.23497	1.11016	1.32094	1.27039	1.03851	1.15363	1.41976
2498.62	1.26919	0.970045	1.13325	1.29025	1.11266	1.34289	1.28743	1.0601	1.15712	1.46061
2498.95	1.27824	0.971808	1.15154	1.33258	1.11227	1.35935	1.29084	1.07956	1.1654	1.48053
2499.28	1.28471	0.986027	1.16386	1.36338	1.11357	1.36766	1.28231	1.09843	1.17675	1.48256
2499.62	1.28772	1.00829	1.17	1.38286	1.11988	1.36522	1.26175	1.1203	1.18749	1.46614
2499.95	1.28458	1.0309	1.17243	1.38913	1.13108	1.35308	1.23012	1.14674	1.19386	1.43234
2500.28	1.27484	1.04854	1.17177	1.38256	1.14446	1.33633	1.19118	1.17363	1.19366	1.38799
2500.62	1.26227	1.06055	1.16845	1.36707	1.15768	1.31793	1.15086	1.1944	1.18667	1.34202
2500.95	1.24856	1.06852	1.16332	1.34752	1.16999	1.29746	1.11426	1.20639	1.17397	1.30034
2501.28	1.23133	1.07491	1.15512	1.32753	1.18103	1.2755	1.08329	1.21066	1.15764	1.26422
2501.62	1.21009	1.08248	1.14322	1.30778	1.19026	1.25286	1.05836	1.20828	1.13983	1.23168
2501.95	1.18893	1.09115	1.13119	1.28595	1.19801	1.22785	1.04001	1.20118	1.12112	1.20043
2502.28	1.17139	1.0979	1.12202	1.26	1.2062	1.19934	1.02801	1.19243	1.10151	1.17033
2502.62	1.15598	1.10013	1.11328	1.23094	1.21685	1.17006	1.02072	1.18356	1.08224	1.14272
2502.95	1.13943	1.09523	1.10095	1.20121	1.23011	1.14375	1.01588	1.17391	1.06512	1.11751
2503.28	1.12134	1.08172	1.08473	1.172	1.24411	1.12199	1.01127	1.16231	1.05106	1.09379
2503.62	1.10387	1.06397	1.06745	1.14407	1.2568	1.10554	1.00556	1.14799	1.03908	1.07295
2503.95	1.08797	1.04763	1.05097	1.11949	1.26756	1.09383	0.999239	1.13113	1.02686	1.05658
2504.28	1.07225	1.03204	1.03425	1.10009	1.27691	1.08272	0.993075	1.1127	1.0131	1.0426
2504.62	1.05617	1.0153	1.01669	1.08517	1.28534	1.06827	0.98649	1.09314	0.998925	1.02756
2504.95	1.04186	1.00018	1.0018	1.07209	1.29186	1.05167	0.979241	1.07265	0.986512	1.0103
2505.28	1.03009	0.988372	0.993705	1.05949	1.29277	1.03584	0.972082	1.05271	0.976634	0.991301
2505.62	1.0179	0.976702	0.990451	1.04956	1.28443	1.02059	0.964994	1.03534	0.968076	0.971264
2505.95	1.00301	0.962839	0.985742	1.04432	1.26783	1.00368	0.957837	1.02083	0.95967	0.951413
2506.28	0.986732	0.948801	0.976195	1.0401	1.24769	0.985027	0.952068	1.00763	0.952021	0.933803
2506.62	0.971127	0.937336	0.96374	1.03043	1.22795	0.968924	0.949457	0.994654	0.946779	0.920776
2506.95	0.956443	0.928942	0.953468	1.01376	1.20897	0.958893	0.950184	0.982658	0.945293	0.913508
2507.28	0.941675	0.922982	0.949496	0.994776	1.18823	0.951145	0.952383	0.973133	0.947328	0.910468
2507.62	0.926908	0.918645	0.950228	0.978044	1.16486	0.938834	0.952892	0.966556	0.950308	0.907682
2507.95	0.913359	0.914819	0.950109	0.962651	1.1422	0.922047	0.950187	0.961877	0.951284	0.902429
2508.28	0.900675	0.912014	0.946837	0.945318	1.12298	0.908464	0.946151	0.957343	0.949773	0.896404
2508.62	0.887752	0.91317	0.942496	0.926393	1.10564	0.902781	0.943108	0.951914	0.947228	0.892967
2508.95	0.875942	0.919149	0.939308	0.909019	1.08788	0.899763	0.940975	0.946388	0.944791	0.892248
2509.28	0.867233	0.925994	0.938703	0.894629	1.06918	0.893121	0.939172	0.942909	0.943305	0.890442
2509.62	0.860741	0.93044	0.94147	0.882289	1.04891	0.885478	0.939276	0.942329	0.94391	0.884244
2509.95	0.854455	0.935156	0.945729	0.871315	1.02709	0.881528	0.943076	0.942519	0.947104	0.875896
2510.28	0.848435	0.944647	0.947923	0.862879	1.00633	0.879736	0.949522	0.940846	0.952468	0.870828
2510.62	0.844205	0.958744	0.947448	0.857477	0.98868	0.877864	0.956173	0.937387	0.959394	0.870338
2510.95	0.842042	0.974211	0.948209	0.852891	0.972888	0.877692	0.961568	0.934243	0.967394	0.872328
2511.28	0.840261	0.989987	0.954469	0.849049	0.956403	0.88058	0.964863	0.933028	0.975854	0.877539
2511.62	0.837422	1.00641	0.965917	0.851	0.937667	0.884888	0.966555	0.934218	0.983646	0.887162
2511.95	0.832606	1.02221	0.978164	0.86151	0.917043	0.888379	0.969228	0.937447	0.989913	0.898022
2512.28	0.823018	1.03602	0.987558	0.874927	0.896766	0.889324	0.974096	0.941316	0.994698	0.907987
2512.62	0.807018	1.04813	0.993419	0.8825	0.87912	0.886594	0.979273	0.944187	0.997438	0.920393
2512.95	0.78989	1.05869	0.996668	0.880611	0.864296	0.881645	0.983024	0.945858	0.996448	0.93745

## Sheet: All Standards
Energy (eV)	Ammonium Sulfate	Barite	Chalcopyrite	Copper(II) Sulfate	Diethyldithiophosphate ammonium salt	Galena	Gypsum	Iron ammonium sulfate	Iron(II) sulfide	Iron(III) Sulfide	Jarosite	L cysteine	L cystine	L methionine	Magnesium sulfate	P43 (Cd2SO3)	PIPES	Phenyl sulfone	Potassium sulfate	Pyrite	SQDG Lipid	Sodium hydrosulfite	Sodium sulfate	Sphalerite	Sulfanilamide	Sulfur (Baja)
2462.2	5921.18	275.24	932.327	1500.86	60.915	597.332	518.121	-255.506	33.005	474.914	-38.0751	1957.31	1358.19	761.804	1387.9	181.203	2034.46	98.0388	551.742	823.615	46.541	-170.303	-791.234	1163.58	2277.94	1005.54
2462.53	5914.74	276.004	921.436	1448.99	73.5415	584.094	538.441	-260.218	72.4404	463.981	26.5646	1896.5	1396.94	892.552	1407.56	183.637	2049.12	283.236	608.346	788.878	50.9182	-73.5562	-670.912	1214.77	2283.62	982.456
2462.87	6042.4	276.769	910.542	1397.11	86.1718	570.853	558.768	-264.931	111.888	453.046	91.2238	1835.67	1435.69	1023.34	1427.22	186.073	2063.79	468.488	664.968	754.132	55.2966	23.2193	-550.553	1265.98	2289.31	959.369
2463.2	6201.5	277.533	899.651	1345.25	98.7983	557.615	579.089	-269.643	151.323	442.113	155.863	1774.86	1474.43	1154.09	1446.87	188.508	2078.45	653.685	721.572	719.396	59.6738	119.966	-430.231	1317.18	2294.99	936.289
2463.53	6338.46	278.297	888.76	1293.38	111.425	544.378	599.41	-274.354	190.758	431.181	220.503	1714.04	1513.18	1284.83	1466.53	190.942	2093.12	838.882	778.177	684.66	64.0509	216.712	-309.908	1368.37	2300.68	913.209
2463.87	6430.74	279.061	877.865	1241.5	124.055	531.137	619.737	-279.068	230.206	420.245	285.162	1653.21	1551.93	1415.62	1486.19	193.378	2107.78	1024.13	834.798	649.913	68.4293	313.488	-189.55	1419.58	2306.37	915.148
2464.2	6577.81	279.825	866.975	1189.63	136.682	517.899	639.258	-283.779	269.641	409.313	349.802	1592.4	1544.96	1546.37	1505.84	195.812	2122.45	1209.33	891.403	615.177	72.8065	410.234	-69.2275	1470.78	2312.05	917.807
2464.53	6495.63	289.148	856.084	1137.77	149.308	504.662	644.154	-288.491	309.076	426.84	414.442	1531.59	1521.32	1677.12	1525.49	198.247	2137.11	1394.53	948.007	580.441	77.1836	506.981	51.0949	1521.97	2317.74	923.659
2464.87	6578.6	305.813	845.189	1085.88	161.938	491.42	659.726	-293.204	348.524	440.367	479.101	1470.75	1596.95	1807.9	1545.15	200.683	2151.78	1579.78	1004.63	545.694	81.5621	603.756	171.453	1573.18	2323.42	953.966
2465.2	6713.58	311.854	834.298	1034.02	174.565	478.183	678.75	-297.916	387.959	461.156	543.741	1409.94	1607.21	1938.65	1564.81	203.117	2166.44	1764.98	1061.23	510.958	85.9392	700.503	291.776	1624.38	2329.11	991.97
2465.53	6810.96	341.616	823.407	982.152	187.191	464.945	684.343	-302.628	427.394	478.094	608.38	1349.13	1633.8	2069.4	1584.46	205.552	2181.1	1950.17	1117.84	476.222	90.3163	797.249	412.098	1675.57	2334.79	1016.54
2465.87	6967.98	319.473	812.513	930.27	199.822	451.704	685.662	-307.341	466.842	467.17	673.039	1288.3	1695.54	2200.19	1604.12	207.987	2195.77	2135.43	1174.46	441.476	94.6948	794.846	532.457	1726.78	2340.48	1062.29
2466.2	6963.74	308.291	801.622	878.404	214.793	438.466	655.027	-312.053	506.277	461.724	744.861	1252.58	1731.76	2330.94	1676.44	210.422	2210.43	2320.62	1231.06	533.243	99.0719	766.375	652.779	1777.98	2346.17	1111.06
2466.53	7264.35	331.65	790.731	826.538	231.286	425.229	699.827	-316.765	542.41	520.138	792.115	1310.16	1793.54	2432.16	1679.93	212.857	2225.09	2505.82	1260.24	540.21	103.449	806.377	674.893	1829.17	2351.85	1150.49
2466.87	7189.14	321.349	779.837	788.358	244.913	411.988	738.321	-321.478	557.563	509.859	782.481	1328.49	1782.12	2473.62	1720.21	215.292	2251.72	2503.57	1266.25	516.42	107.828	853.484	650.757	1880.38	2357.54	1192.43
2467.2	7412.47	330.48	768.946	782.636	253.372	398.75	732.092	-326.19	556.918	476.462	778.626	1329.9	1891.97	2527.78	1678.02	217.727	2367.43	2475.91	1357.78	528.807	112.205	856.944	653.57	1931.57	2363.22	1244.39
2467.53	7679.17	361.01	798.598	772.35	256.245	385.513	729.209	-263.402	587.363	501.162	759.539	1429.22	1948.36	2590.35	1745.54	220.162	2326.58	2739.53	1377.24	581.874	116.582	857.528	674.294	1982.77	2368.91	1289.04
2467.87	7573.61	360.918	826.854	806.064	258.043	393.458	700.616	-229.997	593.413	525.008	781.066	1468.23	1991.15	2695.23	1822.16	222.919	2363.72	2636.54	1335.31	616.907	120.96	892.307	673.32	2033.98	2465.77	1335.22
2468.2	7592.34	341.255	835.999	786.273	265.129	434.965	778.125	-188.108	597.607	533.186	788.261	1467.33	2064.98	2765.28	1828.75	228.608	2447.45	2706.65	1386.16	620.176	125.337	918.183	676.975	2082.52	2518.91	1394.34
2468.53	7835.84	355.874	891.986	803.013	276.696	454.748	764.922	-120.524	667.131	527.387	785.094	1518.55	2181.57	2889.35	1864.97	234.385	2485.16	2705.9	1383.02	645.591	129.715	969.961	686.181	2158.38	2530.17	1516.88
2468.87	7889.33	362.257	998.382	796.439	285.434	487.165	766.531	-68.2177	719.509	525.427	816.083	1536.04	2285.78	2973.23	1885.57	237.905	2477.32	2761.85	1435.86	730.204	138.065	943.494	705.549	2249.68	2527.68	1677.73
2469.2	8175.56	363.806	1071.25	879.175	290.564	495.768	801.556	-43.132	782.707	536.703	804.592	1584.64	2422.16	2987.17	1927.08	240.708	2561.27	2822.79	1468.39	750.45	147.613	975.684	752.761	2272.16	2581	1801.18
2469.53	8350.03	371.561	1221.48	814.655	301.844	549.992	828.011	0.757576	923.857	554.555	816.33	1703.49	2603.62	3132.88	1942.51	244.132	2645.41	2866.83	1467.5	788.699	152.213	1038.84	753.731	2357.99	2650.55	1976.62
2469.87	8476.77	395.736	1547.51	853.75	325.775	672.095	820.455	59.6608	1251.71	583.13	916.759	1795.4	2855.98	3299.44	1992.33	249.853	2679.89	2944.07	1536.93	862.835	149.66	1042.14	778.161	2466.34	2763.07	2200.69
2470.2	8550.36	399.885	2232.43	884.754	359.561	912.41	841.566	103.747	1780.98	572.216	947.656	1913.83	3147.1	3557.13	1972.92	262.526	2789.31	3050.94	1525.85	1024.1	144.859	1104.45	778.669	2539.53	2756.58	2463.05
2470.53	8583.23	412.777	3710.57	865.115	406.265	1294.96	852.059	140.637	2581.49	542.565	959.132	2053.45	3469.81	3856.52	2094.24	283.333	2765.16	3104.74	1562.86	1189.48	144.486	1199.5	776.125	2675.36	2779.27	3176.01
2470.87	8868.71	439.491	5022.16	975.536	487.826	1822.69	880.42	182.337	3639.3	567.207	919.267	2283.66	4069.64	4109.16	2125.95	310.587	2850.64	3201.57	1631.09	1720.96	148.004	1306.18	806.402	2844.24	2844.99	3619.55
2471.2	9093.1	456.03	5501.86	923.481	647.549	2484.24	954.389	231.826	4431.51	633.894	931.399	2585.07	5037.13	4510.5	2158.23	352.428	2944.4	3287.7	1648.58	2423.54	148.814	1393.32	830.358	3040.33	2960.93	3990.48
2471.53	9418.07	427.908	5046.8	975.141	945.663	3011.11	972.724	277.613	4683.92	611.632	986.686	3141.78	6666.61	5320.88	2239.08	427.722	3001.06	3385.15	1702.28	3879.56	146.794	1658.74	867.078	3292.22	3037.83	4852.52
2471.87	9419.44	439.917	4094.15	1022.99	1415.18	3307.75	1015.24	340.917	4712.63	626.808	1008.96	4078.83	9641.9	6599.23	2267.84	554.597	3032.11	3461.15	1719.34	6190.67	149.474	2045.26	888.631	3664.62	3093.23	5928.52
2472.2	9439.79	466.232	3262.84	1022.53	1989.64	3516.48	936.689	327.49	4443.53	615.808	1031.66	6224.47	14398.1	8805.25	2303.75	748.096	3064.31	3591.57	1739.15	7201.73	157.231	2313.35	901.318	4302.04	3163.99	7103.54
2472.53	9609.19	450.573	2760.02	1052	2511.86	3863.34	969.593	328.041	3926.02	659.402	1082.71	10557.5	19528.6	13259.9	2444.65	1024.12	3124.21	3808.35	1810.25	7392.54	160.926	2410.17	942.326	5423.01	3267.16	8086.03
2472.87	10077.2	461.116	2640.71	1085.94	2845.49	4261.4	999.46	344.259	3656.26	695.742	1105.5	16614.2	23242.5	21007.7	2475.42	1390.52	3344.18	3815.05	1816.73	7325.34	157.253	2415.06	1002.82	7645.39	3330.13	8580.67
2473.2	10355.9	489.316	2987.69	1087.97	2967.06	4548.68	960.167	388.521	3464.8	696.643	1107.27	21219.3	24063.6	30017	2563.57	1832.69	3467.13	3909.69	1859.82	6460.4	152.529	2479.86	1005.79	12043.9	3472.2	8692.66
2473.53	10356	496.968	3736.34	1092.22	2952.04	4560.18	1014.97	434.635	3350.64	710.283	1155.35	21853.8	21784	34200.6	2621.17	2302.2	3610.46	4092.05	1932.49	6537.27	151.801	2636.43	1028.92	17674.1	3634.43	8704.74
2473.87	10778.6	496.461	4595.95	1182.12	2895.72	4333.76	1086.18	376.148	3413.3	715.496	1201.65	20959.5	19187.6	33955	2631.11	2713.64	3691.51	4194.87	1989.7	6026	156.432	3017.94	1043	22586.6	3754.82	8561.59
2474.2	10963.2	508.265	5562.18	1146.9	2853.36	3582.03	1074.14	395.206	3731.31	739.362	1179.34	20404.2	18488.3	31427.8	2749.41	2990.78	3848.88	4543.44	2006.31	5313.19	166.993	3914.57	1085.05	25410.6	3805.98	8281.62
2474.53	11375.4	533.829	6141.39	1211.98	2835.15	3190.91	1158.22	404.119	3852.94	777.79	1291.85	18339.1	20247.6	30613.4	2825.2	3129.32	3956.63	4425.95	2004.66	4852.43	180.309	5286.91	1059.04	25790.8	3842.71	8019.92
2474.87	11469.6	545.282	6686.24	1229.02	2832.62	2985.26	1166.24	442.21	4057.3	813.968	1348.86	15883.7	20743.5	28665.9	2865.54	3179.94	4174	4602.81	2106.33	4210.65	190.917	7148.21	1058.57	25148.7	3989.38	7621.73
2475.2	11666.5	570.083	7021.54	1231.21	2836.26	2612.49	1178.53	471.036	4314.67	822.95	1361.6	13445.1	18625.4	25163.6	2936.48	3186.71	4284.04	4788.09	2149.66	3510.99	197.607	8776.38	1113.93	24335.4	4165.44	7141.62
2475.53	12133.8	585.031	7296.52	1292.7	2841.07	2233.75	1256.86	476.43	4562.71	839.695	1384.02	11844.5	15715	22509.5	3077.27	3175.7	4348.74	5112.08	2285.09	3141.77	203.781	9432.86	1174.58	23764.5	4326.77	6739.01
2475.87	12490.8	604.839	7665.25	1406.23	2845.11	2047.29	1274.25	491.059	4800.02	883.972	1465.64	11900.8	14022.9	22488.7	3184.13	3171.6	4572.65	5457.93	2309.93	2676.57	212.656	9033.4	1200.24	23551.1	4449.28	6328.1
2476.2	13001.5	624.937	7948.79	1467.12	2840.91	1881.33	1410.93	454.057	5044.76	923.206	1519.75	12578.4	12978	23554.5	3304.05	3201.72	4809.24	5812.99	2380.5	2598.47	223.573	8513.25	1280.53	23594.3	4643.52	5927.51
2476.53	13444.7	630.635	8299.41	1479.49	2818.12	1771.91	1406.66	523.37	5260.77	1017.83	1584.53	13259.2	12529.6	24073.1	3575.61	3299.67	5055.62	6427.33	2514.06	2451.24	232.769	8791.7	1366.62	23389.8	4872.18	5633.52
2476.87	13901.6	677.306	8475.32	1480.38	2779.91	1669.98	1423.43	518.239	5400.57	1127.37	1671.38	13690.7	12494.8	24140.3	3675.62	3487.64	5313.71	7084.83	2549.17	2474.19	237.07	10092.7	1407.91	22597.2	5066.91	5566.42
2477.2	14188.6	713.233	8477.81	1581.34	2744.27	1602.68	1528.46	549.666	5567.51	1372.75	1880.61	13861.1	12732.8	24372	3882.42	3736.21	5795.06	8227.7	2627.51	2650.44	236.71	11132.9	1488.04	21581.5	5455.38	5669.5
2477.53	15133.8	798.999	8443.53	1757.75	2724.21	1617.79	1603.76	593.457	5700.27	1646.74	2198.36	13926.3	13248.5	24701.2	4219.83	3961.8	6147.01	10378.7	2781.49	3216.56	235.436	10971.7	1585.13	20973.4	5895.37	5891.13
2477.87	15697.2	869.805	8615.33	1866.67	2716.8	1668.29	1688.07	572.769	5913.91	1853.8	2762.25	14124.6	13991.9	24706.3	4629.96	4069.59	6841.82	14972.4	2921.34	3701.42	235.733	10446.9	1655.92	21209.1	6421.68	6259.63
2478.2	16485	877.855	8729.65	2012.37	2712.77	1731.02	1783.37	596.13	5996.09	2020.69	3564.03	14389.2	14981	24724.6	5064.56	4004.91	7782.53	21978.2	3113.16	4359.07	236.753	10887.1	1861.32	21784.2	7293.56	6678.13
2478.53	17576.9	966.625	8564.31	2193.64	2706.56	1797.21	1899.07	648.752	6061.59	2247.65	4343.31	14296.7	15981.6	24972.3	5541.02	3793.69	9087.49	27594.7	3309.39	4430.21	241.908	11910.7	2102.07	22063.6	8628.65	7030.71
2478.87	18957.9	1075.74	8510.33	2461.18	2695.83	1891.21	2085.7	702.768	6146.31	2519.92	5289.13	14447.5	17082.5	25142.5	6445.73	3534.33	10913.5	26544.8	3572.66	4589.92	262.831	12531	2317.1	21603.8	10500.6	7357.78
2479.2	20406.2	1122.32	8356.95	2852.66	2678.19	2027.76	2322.93	808.002	6291.03	2807.14	6271.66	14559.2	17790.6	25269	7407.66	3314.09	13720	28713.4	3972.59	4796.75	312.144	12572.1	2701.39	20779.7	14007.6	7613.25
2479.53	22243.6	1286.98	8120.3	3468.86	2648.5	2144.18	2457.4	864.533	6314.15	3022.35	6811.02	14408.6	17788.7	25043.2	8526.7	3141.75	18217.4	34061.6	4449.06	4866.82	396.245	12270.2	3252.79	19873.8	20780.2	7843.19
2479.87	24256.8	1543.44	7895.62	4375.32	2600.35	2290.88	2752.32	1054.23	6325.32	3062.7	7261.8	14457.9	17491.4	24774.4	10501.1	2981.16	26525.6	37231.7	4971.75	5098.88	522.348	11910.8	3832.92	18891.9	29649.5	8073.84
2480.2	27581.7	1931.82	7632.39	5813.32	2537.94	2534.96	3357.58	1313.97	6295.18	3340.81	8265.92	14441.1	17170.1	24651.4	13099.3	2811.77	35669.6	39774.9	5625.93	5165.99	720.643	11612.6	4824.6	18331.5	37635.9	8219.63
2480.53	33138	2510.96	7473.62	8739.93	2481.35	2792	4086.41	1752.17	6225.16	4202.89	10378.4	14153.2	16877.5	24563.9	17473.2	2640.27	41870.7	42444.7	6630.23	5486.38	1038.37	11504.4	6588.35	18033.3	42810.5	8335.36
2480.87	42936.3	3746.38	7362.06	11846.5	2447.08	3097.24	5601.13	2603.03	6108.37	5919.96	14255	13968.5	16518.6	24514.7	23842.6	2485.7	45395.8	44346.3	7915.06	5347.29	1494.63	11444.7	9072.03	17920	46629.5	8372.35
2481.2	55146.9	6002.41	7179.32	16624.8	2427.65	3296.32	8330.58	4256.38	6073.87	8561.72	19302.4	13827.8	16300.8	24303.1	29972.3	2360.8	47307	45994.2	9928.55	5504.01	2092.68	11756.1	12518.9	18179.8	50542.8	8447.35
2481.53	70278.7	9115.91	7153.97	21735.8	2404.57	3483.61	12649.3	6714.71	6009.97	12269.8	24621.4	13745.8	16185.5	24096.7	36429.1	2257.66	47297.2	46932	13255.7	5516.23	2853.51	12005.9	15841.7	18247	54567	8586.73
2481.87	82688.1	12670.4	7039.53	26193.5	2376.55	3668.76	18219.8	9715.57	5914.31	16205.9	30106.6	13746.5	16055.3	24098.6	41235.1	2160.24	46177.8	45137.7	17738.4	5554.09	3686.63	12368.2	19392.4	17889.8	57488.4	8576.22
2482.2	87974	14399.8	6921.24	28731.2	2359.24	3761.62	22479.1	12239.9	5895.68	18929.5	34033.6	13732.5	16068	24059.7	43500.1	2068.39	43817	41002.9	23257.2	5596.81	4279.46	12600.5	22483.2	17267.1	59748.9	8464.28
2482.53	89377.4	14430	6893.27	29658.1	2361.28	3823.3	24759.3	12514.3	5835.15	19875.6	35238.5	13606.5	16202	24065.6	44273.8	1995.49	40631.4	36210.2	28875	5800.58	4333.78	12771.1	24368.6	16617.2	60748.2	8433.99
2482.87	87035.5	12519.1	6914.47	28020.4	2375.71	3906.5	24475.5	10538.4	5987.96	18888	32705.9	13611.5	16470	24033	43350.6	1952.24	38278.8	32938.3	32268.6	6078.97	3873.76	13025.8	24335.4	16041.1	59535.5	8427.26
2483.2	84328.2	9547.01	6969.31	23974.5	2389.51	3921.16	21954.6	7987	6086.12	15813.5	26829.9	13585.6	16759.2	24218.7	40319.8	1944.58	36446.8	30985.7	34232.9	6343.68	3200.37	13069.3	22362.1	15707.8	55311.6	8486.73
2483.53	81372.5	7423.24	6869.84	19259	2393.22	3910.79	16828.2	6107.21	6152.44	11637.3	19573.5	13768.3	17278.8	24441.4	34207.4	1977.72	34266.6	29813.1	34152	6234.97	2619.23	12666.6	18966.6	15808.3	48886	8567.21
2483.87	77609.6	6821.05	6890.44	15030.6	2388.45	3880.56	12448	4860.15	6121.3	8364.94	13806.3	13967.7	17695.1	24473.2	27373.8	2046.57	32134.4	29066.9	31925.4	6273.55	2242.49	11920.6	15054.6	16298.9	42545.2	8584.37
2484.2	73725.8	6817.68	6975.29	12148.6	2389.72	3903.41	9641.16	4067.97	6089.99	6378.98	10054.1	14282.5	17936.3	24516.3	20749.7	2125.03	30935.1	27793.8	27412	6074.69	1988.07	11212.3	11945.7	16873.8	37311.9	8717.08
2484.53	70578.8	6615.11	7043.57	9894.72	2414.06	3893.6	8680.97	3642.35	5995.07	5201.61	8290.89	14524.6	18246.5	24889.5	17027.5	2183.2	30043	26923.1	22222.7	6031.85	1748.51	10815.9	9814.49	17675.2	33167.4	8811.38
2484.87	69294.9	6252.23	7263	8924	2466.51	3818.19	8693.51	3381.43	5783.62	4639.18	7491.31	14852.1	18482.3	25231.1	15875.1	2218.3	29609.5	26362.8	17655.1	6109.62	1519.19	10550.4	8455.63	18641.3	30397.6	8842.36
2485.2	68693.7	5709.17	7422.51	8600.5	2534.71	3768.55	9004.51	3280.16	5697.82	4498.82	7114.32	14925.9	18479.5	25641.6	16000	2259.11	29962.3	26705.3	15924.4	6033.73	1353.75	10639.6	7768	19752	28469.5	8927.29
2485.53	67138.7	4930.29	7622.47	8573.36	2598.74	3650.03	9190.89	3189.17	5802.91	4409.25	7138.79	15053.4	18477.9	25900.3	16523.9	2335.2	30137.7	27012.5	16117	6018.38	1270.48	10693.1	7579.94	20800	27614.4	9030.97
2485.87	66121.5	4393.17	7900.43	8608.9	2647	3594.35	9889.72	3230.97	5954.27	4459.72	7535.86	15294.1	18425.1	26132.2	16948.9	2441.95	30165.1	27737	17359.8	6198.46	1235.85	10689.4	7695.27	21681.7	27130.9	9151.89
2486.2	65512.8	3812.31	8201.74	8736.5	2682.13	3600.39	9535.93	3327.58	5957.47	4404.12	7959.75	15490.8	18348.6	26489.3	17028	2543.95	30056.4	28213.3	18455.9	6251.4	1210.15	10717.2	7974.47	22477.4	27116.1	9402.01
2486.53	64324.3	3380.17	8435.47	8961.69	2712.17	3628.04	8951.26	3403.23	6061.79	4439.76	8367.27	15592.2	18466.9	26908.2	16840.7	2614.78	30275.9	28979.9	18768.2	6472.65	1184.76	10672.8	8013.23	22968.6	27781.3	9568.71
2486.87	62842	3204.98	8770.21	8960.76	2742.83	3694.83	8086.16	3381.32	6203.55	4462.07	8783.55	15746.3	18566.3	27186.6	16815.2	2661	30215.5	29122.9	18634.9	6459.14	1171.37	10741.7	7964.8	23261.1	28842	9622.37
2487.2	62045.2	3099.9	8910.96	9082.46	2780.75	3830.7	7644.56	3364.26	6184.56	4587.45	8899.77	15868	18698.5	27526.1	16677.4	2706.75	30382.2	29681.6	18404.9	6444.13	1178.49	10871.4	8067.59	23378.5	29780.3	9739.05
2487.53	61273.9	3140.25	8943.49	9252.72	2831.81	3852.37	7134.09	3528.43	6256.25	4734.93	8985.74	16186.5	18945.1	27723.8	16907.1	2763.15	30479	29994.3	18178.6	6541.98	1211.22	10967.9	8236.32	23435.5	30614.6	9836.34
2487.87	60851.5	3257.28	9136.85	9379.11	2893.09	3910.27	7190.16	3786.29	6461.51	4819.9	9064.51	16113.8	19080.5	27805.8	17113.7	2824.72	30580.2	30207.2	18288.7	6640.63	1266.07	11208.9	8270.79	23417.3	32240	10051.3
2488.2	61778.7	3510.18	9270.15	9379.3	2956.27	4051.24	7428.62	3925.51	6473.26	5083.22	9228	16342	19153.8	28184.7	17101.5	2893.08	30180.2	31341.1	18618.4	6476.81	1324.5	11285.6	8340.99	23379.7	33656	10233.6
2488.53	62411.6	3817.93	9328.12	9690.9	3012.67	4135.82	7696.3	4088.35	6432.44	5311.56	9229.12	16640	19265.4	28568	17217.8	2974.48	30546.4	31783.3	19253.6	6602.01	1374.4	11295.6	8544.9	23392.9	34737.1	10172
2488.87	63324.8	4250.35	9265.34	9859.84	3055.07	4195.02	8129.05	4425.45	6516	5526.23	9563.25	16786.2	19222.1	28506.8	17893.4	3053.67	30207	32225.7	19618.3	6663.28	1417.36	11561.2	8895.48	23331	35690.4	10197.6
2489.2	64054.3	4681.76	9234.5	10136.2	3090.18	4288.88	8438.41	4787.08	6645.17	5743.22	10172.6	16955.1	19222.9	28626.8	18845.4	3108.45	30122.6	33229.1	19731.4	6717.98	1445.23	11799.8	9374.18	23177.7	36346.2	10381.2
2489.53	64949.3	5007.68	9236.24	10240.5	3137.32	4463.15	8658.13	4982.43	6707.06	6088.6	10847.6	16935.7	19169.3	28667.8	19941.8	3142.39	30154.4	34326.9	19068.5	6691.11	1443.93	11765.1	9767.47	23077.9	37448	10574.6
2489.87	64878.5	5083.89	9232.81	10283.8	3204.04	4492.82	9200.84	5358.76	6827.38	6448.88	11205.8	17238.5	19371.2	28831.4	21641.7	3173.78	29855.7	36178.8	17963.7	6841.7	1426.17	11927.7	10377.1	23093.6	38132.3	10729.6
2490.2	64684.8	5042.54	9287.13	10650.5	3277.29	4622.69	9504.23	5616.63	6946.17	6690.74	11433.6	17349.3	19466.2	29122.4	23146.3	3213.86	29875.2	37501.9	16833.3	6877.4	1427.75	12205.4	10940.1	23140.9	38562	10890
2490.53	64225.4	4951.75	9332.65	10820.1	3337.03	4744.82	10178.1	5840.93	6992.7	7027.93	11706.7	17430.2	19511.8	29172.6	24727.1	3266.8	30068.7	38303.7	15780.7	7057.24	1456.61	12283.9	11357.7	23087.9	38815.5	11118.4
2490.87	64754.7	4925.06	9340.11	10870.1	3375.35	4828.31	10870	6042.56	7065.94	7382.33	12018	17791.4	19604.3	29204.2	25632.2	3325.6	30359.5	38242.8	14813.1	7275.48	1481.59	12499.5	11974.2	22905.2	39456.5	11244.9
2491.2	65375.8	4766.65	9512.33	11131.6	3407.17	4956.08	11591	6140.56	7178.05	7532.96	12372.1	17863.3	19858.8	29303.7	26036.3	3375.8	31196.4	37995.5	14399.8	7428.03	1490.58	12884.4	12606.9	22695.3	40363.7	11297.4
2491.53	65149.8	4930.22	9544.53	11271.5	3450.52	5090.96	12200.3	6321.69	7110.33	7698.6	12828.2	17951	20020.1	29493.5	26400.5	3412.66	31259.4	37815.4	14198.9	7549.76	1503.38	13071.5	12778.7	22662.9	40816.9	11355.4
2491.87	65278.4	5209.72	9564.97	11704.2	3502.88	5109.94	12432.4	6402.95	7191.31	7880.94	13288.3	18158.7	20252.8	29753.3	26705	3440.49	31943.4	37146.5	14363.7	7620.81	1522.2	13258.5	12498.2	22832	41343	11458.6
2492.2	65355.4	5652.34	9663.48	12336.8	3557.41	5188.43	12631.2	6549.12	7254.56	8067.3	13478.3	18288.4	20446.9	30047	27256.7	3468.5	33082	37255	14885.4	7710.76	1538.91	13572.7	12041.2	22949.1	41847.8	11592.8
2492.53	66407.2	6264.3	9620.27	12720.9	3621.84	5197.39	12797.9	6728.72	7404.02	8187.63	13686.1	18583.4	20558.3	30046.3	28013.9	3508.2	34224.2	37218.5	15978.8	7699.5	1573.55	13693.1	11820.8	23079.3	42054.4	11735.2
2492.87	66898.4	6528.42	9717.69	13376.8	3697.85	5149.12	12689.3	6893.56	7537.8	8432.14	14053.9	18595.2	20692.7	30274.1	29510	3555.86	35401.6	37272.3	17534.2	7850.1	1645.89	13959.1	11862.7	23319.6	42369.6	11844.3
2493.2	68737.3	6325.47	9859.5	14093.7	3768.33	5172.2	12673.4	7093.18	7485.12	8677.31	14476.8	18707.2	20947.3	30383.4	31448.6	3595.74	36872.8	37708	19321.1	7904.11	1739.32	14177.5	11986.8	23463.2	42833	11925.3
2493.53	69896.4	6210.72	10030.4	14711.9	3825.61	5154.15	12373.2	7309.09	7599.6	8850.4	15082.5	19010.2	21393.9	30537.9	32699.3	3630.34	38075.1	38124.2	20985	7850.59	1828.27	14294.7	12278.2	23980.1	43470.8	12067.6
2493.87	72002	6034.49	10169.8	15347.3	3883.31	5077.18	12197.2	7328.79	7747.15	9030.52	15422.5	19050.5	21734.7	30686.7	34043.7	3680.29	39061.6	38511.2	21967.4	8091.99	1903.72	14441.6	12457.8	24544.1	44274.5	12303.6
2494.2	74104.4	6091.06	10202.6	15943.7	3946.74	5093.23	12117.2	7432.84	7812.57	9261.65	15844.9	19046.6	21964	30959.1	34633.2	3753.12	40211.6	39131.4	22753.5	8084.12	1964.19	14620.7	12397.5	24955.4	44895.4	12559.1
2494.53	75663.9	6416.53	10355.4	16651.6	4003.22	5100.32	12233	7398.67	7840.57	9524.35	16139.9	19389.4	22174	31104.2	35015.8	3837.21	40927.6	39661	23367.5	8266.41	2021.84	14742.2	12494.3	25285.5	45536.2	12627.1
2494.87	76613.3	6818.79	10558.2	17126.1	4050.4	5051.06	12311.5	7478.99	7945.22	9976.23	16411.7	19616.3	22287.9	31341	34727.4	3925.53	42080.3	40171.9	24070.3	8184.45	2095.86	14877.5	12765.5	25593.2	46142.4	12783
2495.2	78372.6	7387.49	10643.8	17440.4	4101.61	5161.82	12856.8	7399.72	8092.37	10298.1	16827.6	19850.6	22561.4	31615.7	34035.2	4026.09	42815.5	41065.2	25002.9	8195.64	2177.11	15050.9	13248.2	26146.5	46807.4	13024.7
2495.53	79498.1	8019.67	10846.5	17451.8	4157.2	5267.54	13305.4	7263.52	8229.44	10576.7	17349.4	20075.4	23163.3	31809.6	33410.1	4138.89	43786.9	41719.3	25893.7	8322.07	2246.69	15352.8	13971.6	26531.8	47375.1	13070.6
2495.87	81099.3	8693.73	10941.5	17808.4	4202.89	5327.83	13795.7	7282.88	8341.04	10920.7	17990	20282.9	23592	31997.8	33061.3	4237.02	44247.3	42275.5	26964.1	8405.13	2317.04	15573.1	14876.7	27076.5	47549.4	13154.3
2496.2	81405.9	9155.51	11066.8	17927.1	4237.56	5363.91	14328.9	7192.33	8459.87	11253.5	19063.6	20680.1	23829.6	32159	32903.4	4305.95	44765	42748	27750.4	8425.76	2397.55	15688.6	16095.4	27572.7	48081.9	13349
2496.53	82811.2	9296.27	11206.2	18337.3	4278.21	5474.11	14783.5	7150.11	8382.4	11642.5	20104.9	20800.1	24300.9	32464.7	32808.3	4377.64	45018.4	43388.9	28634.5	8506.76	2455.92	15954.5	17394	27577.3	48388.5	13581
2496.87	83437.9	9333.18	11316.8	18949.8	4342.94	5590.79	15655.4	7088.84	8663.32	12038.3	21040.2	21196.7	24497.3	32676	33255.3	4478.09	45348.4	43794.4	29294.5	8620.53	2465.53	16450.3	18473.1	27866.9	48862.8	13864.1
2497.2	83728.9	9241.15	11525.1	19287.9	4435.48	5757.99	16457.7	7145.36	8802.22	12246.7	21990.3	21635.3	24967.5	32980.2	34041.4	4593.37	45454.6	44526.4	29868.2	8719.14	2454.69	16667	19465.2	28289.1	49740.9	14039.4
2497.53	84129.5	9008.48	11719.5	19357.9	4536.36	5824.34	17340.5	7218.1	8938.34	12429.7	22704.1	21726.3	25337.9	33082.8	34786.9	4715.21	45747	44798.3	30188.1	8785.29	2469.68	16898	20528.1	28772.9	50297.1	14178.8
2497.87	84857.6	8936.8	11907.8	19731.5	4619.79	5878.3	18183.7	7329.61	9117.77	12735.4	22917.7	22041.7	25518	33305	35364.1	4843.37	45546.7	45550.6	30310.2	8759.96	2520.65	17285.3	21304.5	29183	51270	14424.6
2498.2	85239	8926	11997.4	20303.8	4683.68	5999.12	18776.5	7202.21	9192.62	12915	23008.4	22327.3	25719.6	33598.9	35902.2	4953.29	45605.7	45600.3	30246.6	8909.8	2583.7	17585.1	21546.2	29574.4	52467.1	14640.9
2498.53	85666.5	9110.65	12273.2	20467.9	4745.03	6262.59	19233.1	7233.72	9268.7	13043.2	23094.9	22861.1	25897.9	33994.3	36408.1	5030.56	45970.3	45944.5	30426.8	8904.22	2631.59	17637.8	21866.2	30117.3	53331.7	14750.1
2498.87	85807.3	9399.16	12634.5	20445.2	4812.79	6399.56	19530.3	7193.1	9547.17	13252.7	22841	23205.9	25932.3	34362.4	36869.5	5099.51	45959.4	46586.1	30594	8972.79	2662.02	17793.9	21978.8	30552.9	54077	14854.7
2499.2	86684.8	9606.45	12901.7	20626.4	4882.19	6617.48	19944.2	7206.94	9704.37	13215.4	22465.5	23459.4	26362.9	34695.9	37833	5183.97	46063.4	46311.6	31104.4	9136.88	2696.14	18106.6	21846.8	31226.9	54411.4	14958.4
2499.53	85763.8	9747.57	13210.3	20764.3	4948.03	6657.56	19986.8	7379.16	9959.21	13126.2	21954.6	23925.4	26485.4	34861.1	39055.9	5282.35	46256.1	46682.1	31368.3	9242.05	2736.24	18210.3	21451.1	31804.9	54737.8	15081.8
2499.87	86138.6	9797.51	13405.6	20551	5012.63	6784.73	19854.5	7373.16	10061.3	13085.3	21247.3	24298.1	26582.8	35312	39254.2	5383.77	46236.9	47290.7	31748.1	9262.25	2751.05	18246.6	20996.6	32265.1	55382.8	15247.9
2500.2	86070.1	9906.59	13607.4	20645.4	5079.76	6901.82	19806	7506.27	10118	13077.8	20767	24504.9	26753.8	35905	39566.4	5477.91	46728.2	47465.9	31910.4	9365.69	2721.09	18396.7	20606.6	33003.2	55521.5	15420
2500.53	85866.4	9884.4	14061.9	20683.1	5148.88	6975.09	19578.6	7516.09	10301.1	12949	20379.3	24835.8	26871.1	36012.3	39896.2	5555.27	46807.7	47709.7	31756.1	9462.75	2676.61	18483.6	20282.2	33439.6	55384.7	15571.1
2500.87	85760.9	9932.83	14493.9	20531	5217.24	7235.81	19424	7627.9	10541.4	12844.6	19999	25211.3	27255.5	36392.5	39859	5613.32	46617.4	48213.8	31808.2	9448.32	2676.1	18408.5	20059.8	33514	55566.7	15684.1
2501.2	84864.8	10127.5	14682.1	20085.8	5275.89	7421.82	19418.3	7627.85	10512.3	12833.9	19758.2	25440.9	27552	36709.9	39499.5	5659.47	46720.6	48308.3	31433	9517.97	2742.57	18455.7	19851.7	33952.9	55927.7	15993
2501.53	85300.6	10120.3	14873.1	20336.5	5311.93	7495.74	19213	7692.08	10587.3	12702	19617.1	25467.1	27777.5	36947.4	39619	5698.54	46978.8	48342.4	31148.8	9586.18	2827.25	18584.3	19624	34499.8	56224.1	16143.4
2501.87	84976.9	10120.9	15051	20164.1	5330.47	7640.32	19025.2	7662.75	10910.2	12550.8	19581.1	25842.1	27755.5	37099.4	39511	5724.32	46897.3	48406.7	31086.8	9654.03	2862.63	18657.1	19360.6	34724.2	56277.4	16163.5
2502.2	84954.7	10200.3	15359.6	20201.4	5360.33	7804.95	18724.1	7782.41	11008.5	12387.2	19594.9	26053.4	27906.5	37433.1	39379.4	5733.9	46622.1	48522.5	30656.2	9896.9	2841.87	18588.1	19200.5	34653.4	56216.5	16282.1
2502.53	84729.4	9946.87	15583.5	19844	5420.28	7891.02	18484.4	7832.72	11051.6	12307.8	19543.4	26224	28052.5	37834	39284.6	5739.88	46660	48351.7	30413.9	9960.19	2807.68	18689.8	19113.4	34639.4	56260.6	16471.2
2502.87	84300.4	9686.82	15757.1	19676	5494.67	8050.22	18337.7	7940.58	11277.6	12251.4	19630.9	26489.5	28204.8	38154.9	39052.6	5759.07	46571.6	48396.3	30133	9984.24	2787.18	18738.5	18892.1	34752.2	56155.8	16780.7
2503.2	84559.9	9635.48	15892.1	19461.7	5561.12	8172.51	18010.7	8019.3	11486.6	12127.5	19447.6	26573.9	28651.2	38438.6	38667.6	5791.57	46562.7	48249.3	29972.2	10104.6	2777.42	18826.6	18714.6	34840.7	56236.1	16965.3
2503.53	84193.4	9576.05	15957.9	19395.6	5624.2	8343.5	17851.7	7998.21	11600.9	12252.5	19433.7	26677	28814.4	38741.2	38350.1	5821.13	46721.7	48108.9	29814.7	10282.1	2769.62	18871	18803.3	34965.6	56502.2	17074.1
2503.87	84247.4	9270.26	16261.5	19161.9	5696.39	8419.59	17764.6	8146.56	11781.9	12238.8	19497	27000.6	29244.1	39156.1	38150.4	5840.47	46687.2	48062	29899.1	10285.1	2763.3	18952.9	18716.3	35088.8	56571.9	17276.5
2504.2	83762.7	9169.33	16378.3	18796.2	5766.8	8526.5	17715.5	8077.82	12055.5	12137.8	19330	27419.8	29506.8	39405.6	37610	5860.94	46751.9	48287.4	29565.9	10375	2765.57	19210.8	18661.5	35280.3	56477.5	17544.6
2504.53	84076.1	9127.9	16492.6	18694.7	5813.79	8765.71	17683.2	8189.54	12207.9	12093.4	19291.5	27709.5	29756.3	39725.9	37237.9	5894.76	46601	48513.4	29452	10540.1	2783.27	19385.5	18578.5	35327	56688.7	17796.9
2504.87	84196.3	9052.12	16641.8	19004.9	5835.15	8992.26	17650.5	8230.57	12396.2	12077.6	19273.1	28049.2	29925.2	40009.6	37019.4	5936.71	46707.3	48436.8	29227.3	10818.5	2813	19508.9	18448	35383.3	56719.4	17975.8
2505.2	83704.9	8848.53	16784.4	18917	5855.12	9089.03	17419.9	8090.98	12464.9	12023.9	19226.9	28292.1	30133.5	40411	36863.6	5962.99	47036.3	48091.7	29123	10919.4	2835.05	19664.4	18359.3	35658.9	56920.3	18098.7
2505.53	83837.7	8737.7	16974.9	18839.8	5903.27	9360.36	17669.9	7926.21	12706.9	12039.1	19096.6	28523.3	30511.4	40667.1	36767.5	5959.77	46887.3	48454.9	29200.7	11042.9	2826.93	19860.5	18207.7	35854.1	56730.5	18267.9
2505.87	83481.3	8617.85	17056.2	18677.2	5981.85	9634.52	17754	7833.59	12913.7	11878.4	19091.7	28960.9	30806.4	40862.9	36453.6	5950.77	47075.3	48740.2	29081.8	11265.1	2787.44	19961.5	18116.6	36261.8	56438.6	18523.7
2506.2	83499.1	8596.76	17157.2	18463.3	6065.15	9824.9	17693	7625.8	13062.4	11808	19219.5	29384	30891.6	41076.1	36313.5	5971.32	47411.7	48406.9	28965.8	11388.3	2739.04	20021.7	18091	36705.2	56479.8	18779
2506.53	83551.7	8489.8	17427.9	18332.8	6138.19	10118.6	17519	7599.61	13197.7	11900.8	19190.2	29600.1	31179.1	41431.9	36222.5	6026.21	47138	48375.5	29010.8	11493.6	2706.2	20161.7	18121.6	37042.8	56686	18786.1
2506.87	83094.2	8504.78	17640.8	18701	6209.59	10322.7	17282	7472.71	13502.1	11965.8	19493.6	29730.1	31513.2	41896	36243.8	6098.31	47375.3	48786.4	28976.4	11999.4	2695.76	20252.6	18251.8	37416.1	56142.3	18788.1
2507.2	83279.8	8473.79	18050.8	18752	6282.74	10504.9	17271.5	7226.93	13790.9	11903.2	19378	30115.1	31769.2	42285.1	36337.3	6173.87	47837.4	48886.7	29143.4	11978	2704.86	20545.6	18393.4	37847.9	56195.2	18993.8
2507.53	83136.1	8387.64	18197.2	18593.6	6344.41	10708.4	17293	7083.76	13993	11792	19334.2	30348.3	32132.4	42448	36354.7	6241.28	47744.3	49022.4	29441.8	12182.4	2736.8	20706.2	18290.4	38267.2	56096.4	19220.8
2507.87	83250.7	8385.94	18310.2	18648.1	6387.03	10975	17113.4	7011.75	14176	11692.7	19332.8	30633.9	32184.6	42761	36319.5	6296.45	48247.8	48684.8	29576.5	12192	2785.79	21083.4	18356.4	38655	56074.5	19455.7
2508.2	82795.7	8501.16	18350.5	18628.5	6426.47	11180.1	16887.8	6924.67	14387.8	11864.3	19371.5	31023.6	32138.4	42964.1	36274.4	6353.06	48679.6	48925.2	29620.5	12210.8	2822.88	21198.6	18400.5	38842.6	56388.6	19522
2508.53	83154.2	8631.39	18505.4	18625.6	6486.15	11317.6	16883.7	6755.09	14386.1	11995.7	19448.5	31238.6	32477.5	43128.6	36182.4	6418.1	48453.6	48971.4	29610.8	12511	2823.95	21194.1	18548.6	38992.3	56598.7	19605.5
2508.87	83244	8569.1	18806.1	18647.5	6562.42	11587.7	16767.2	6637.77	14550.6	11834.8	19344.1	31467.1	32762.3	43365.1	36559.6	6474.7	48828.6	49651.6	29727.6	12439	2799.38	21325.9	18697.1	39411.3	56542.9	19799.9
2509.2	83270.7	8578.96	19146.6	18967.1	6625.61	11839.9	16760.6	6599.3	14681.1	11851.8	19457.9	31771.1	33017	43475.6	36743.4	6509.11	48934.9	49464.8	29795.3	12747.5	2785.14	21504.4	18649.1	39579.3	56768.9	19956.2
2509.53	83440.9	8667.74	19401.5	18995.9	6661.53	11984.3	16751.6	6308.74	14907	11998.9	19669.8	31738	33126.6	43728.6	36702.1	6528.05	49373.4	49314.1	29733.1	12955.4	2804.31	21611.3	18525.8	39537.2	56992	20197.3
2509.87	83381.9	8883.5	19504.4	19020	6686.78	12150.9	16575.7	6216.9	14882.1	12010.1	19834.5	32161	33323.6	44009	36677.5	6547.21	49589.8	49640.3	30111.5	13208	2839.87	21825.9	18651.2	39551.8	57150.3	20360.4
2510.2	83831.4	8981.02	19575.9	18951.5	6723.33	12438.7	16808.8	6155.82	14939.4	12026	19922.2	32220.2	33390.1	44345.8	36735.4	6586.17	49880.3	50378.1	30142.3	13305.4	2864.83	21915	18850.3	39744.3	57498.6	20629.6
2510.53	83945.7	9070.45	19563.7	19024	6778.36	12645.9	16834.4	6013.44	14923.4	12101.3	20078.5	32665	33614.7	44471.2	36862.1	6654.03	49865.5	50614.5	30466.8	13457	2886.2	22124	18867.4	39876.1	57867.9	20842.1
2510.87	84228.6	9295.73	19727.5	19391.1	6847.11	12656.4	16710.2	5942.92	15172	12210.1	20196.1	32814.7	34031.4	44571.1	37008.2	6726.97	49848.6	50587.4	30753.8	13604.8	2926.07	22210.1	18945.3	39895.8	57864.2	20885.5
2511.2	84114.9	9394.81	20008.3	19686	6922.47	12882.6	16784	5817.54	15230.5	12311.6	20053.4	33040.9	34281.7	44900.4	37243.3	6779.04	50401.9	51133	30901.4	13733	2981.12	22408.5	19352.7	39965.5	58182.8	21103.4
2511.53	84736.7	9532.91	19998.7	19764.3	6997.35	12969	17123.5	5632.87	15387.5	12373.5	20315.3	33320.6	34272	45146.1	37566	6833.35	50592.2	51194.4	31357.6	13937.7	3029.95	22585.3	19532.6	39955.4	58693.8	21419.8
2511.87	84136.1	9577.4	20120.2	20031.3	7062.46	13107.9	17502.6	5515.25	15486.3	12483.5	20498.4	33507.1	34454.6	45186	37744.7	6928.77	50918	51228.8	31495.1	14115.9	3063.27	22774.1	19579.4	40034.3	59061.9	21360.1
2512.2	83753.8	9760.32	20302.5	19959.6	7112.12	13190	17525.6	5395.87	15434.4	12507.4	20522.9	33856.2	34819.4	45259.8	37685.2	7044.21	50769.7	51725.3	31650.8	14459.2	3084.2	22970.4	19860.6	40114.5	58857.2	21278.5
